# Supplementary material for: Skin Mast Cell-Driven Ceramides Drive Early Apoptosis in Pre-Symptomatic Eczema in Mice
Source: MDPI journal article supplement (doi:10.3390/ijms22157851), 2021-07-22
Supplement: s1 [file s1]

Original Images for Western blots:

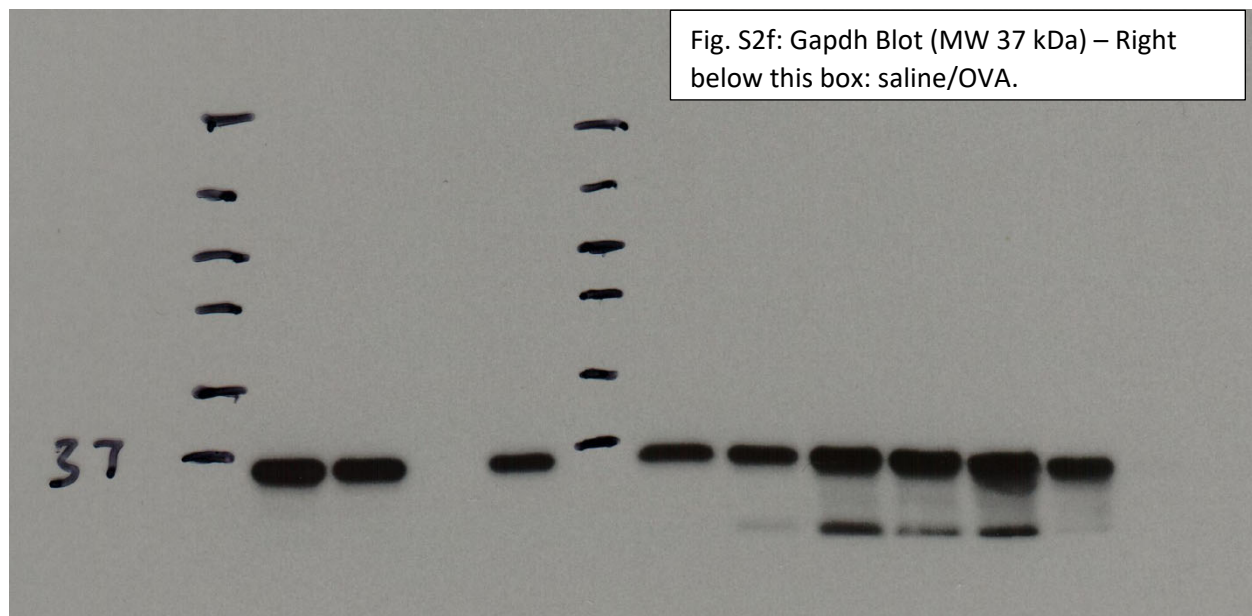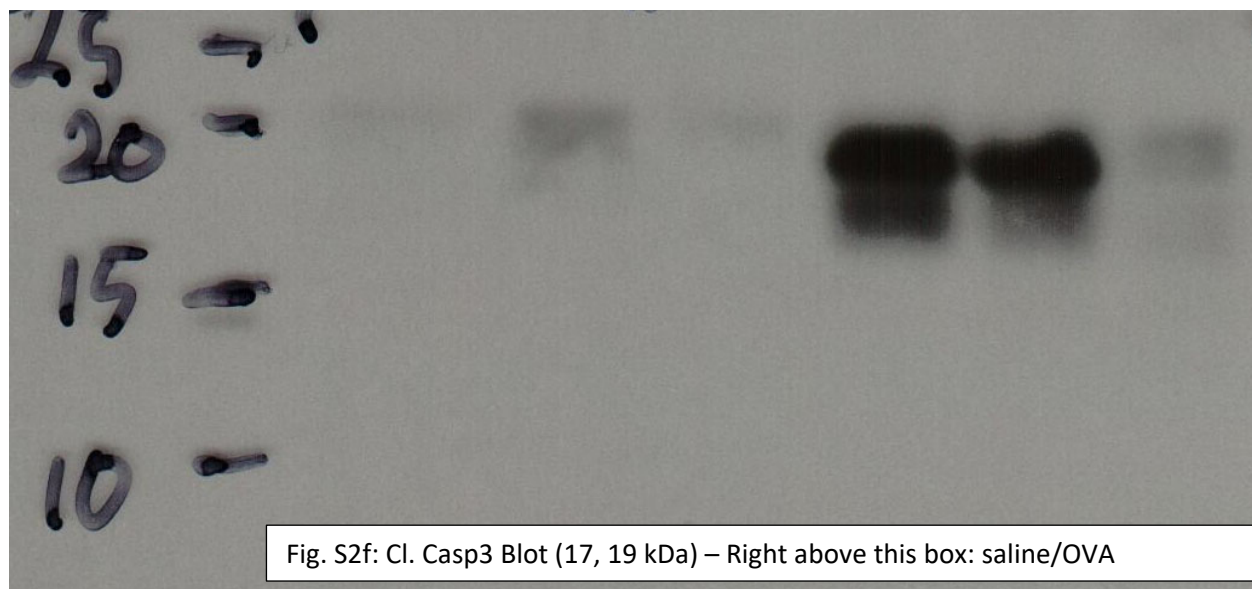



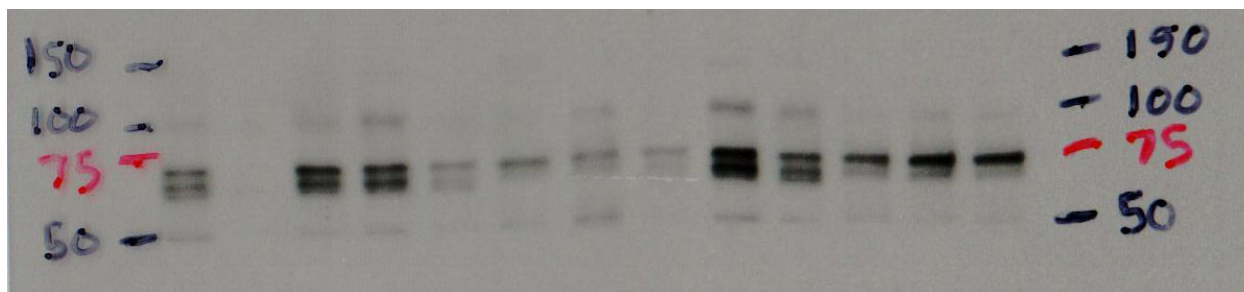

Fig S3b: Bip (78 kDa) – Above this box:saline/OVA

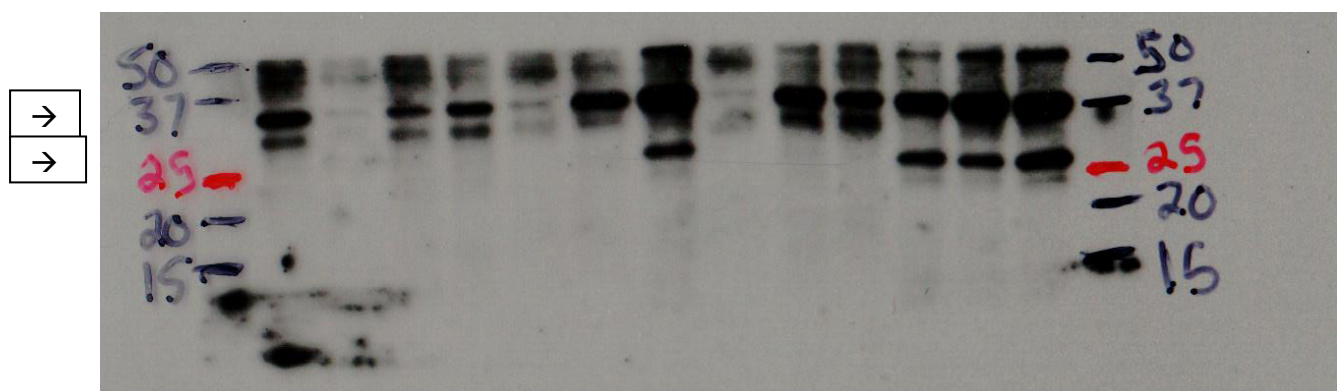

Fig S3b: Chop (27kDa) and GAPDH (37kDa)—Above this box:saline/OVA

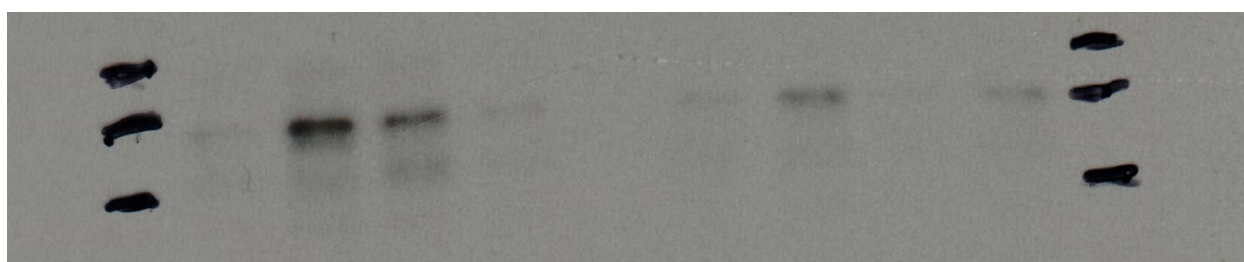

Fig. S4e: Cl. Casp3 (17,19kDa) – Saline/OVA



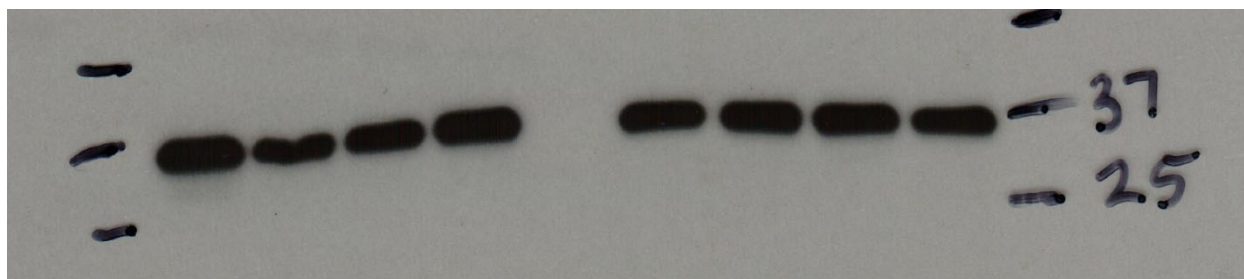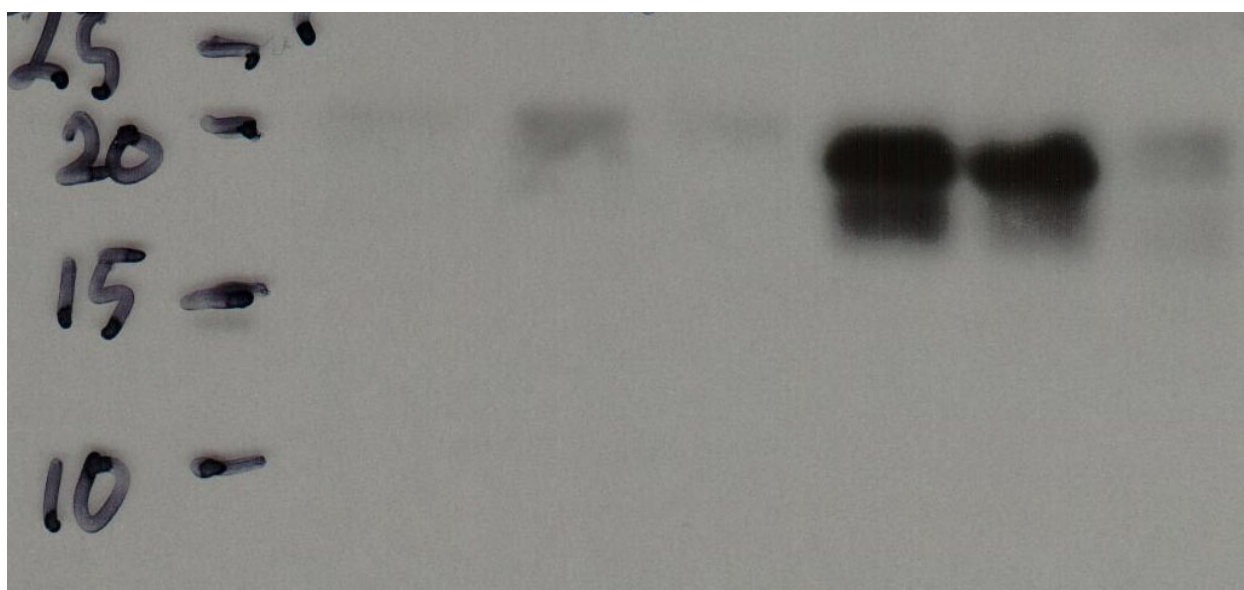

Fig S4g: Cl. Casp 3(17,19kDa) lanes 1-3 -- saline



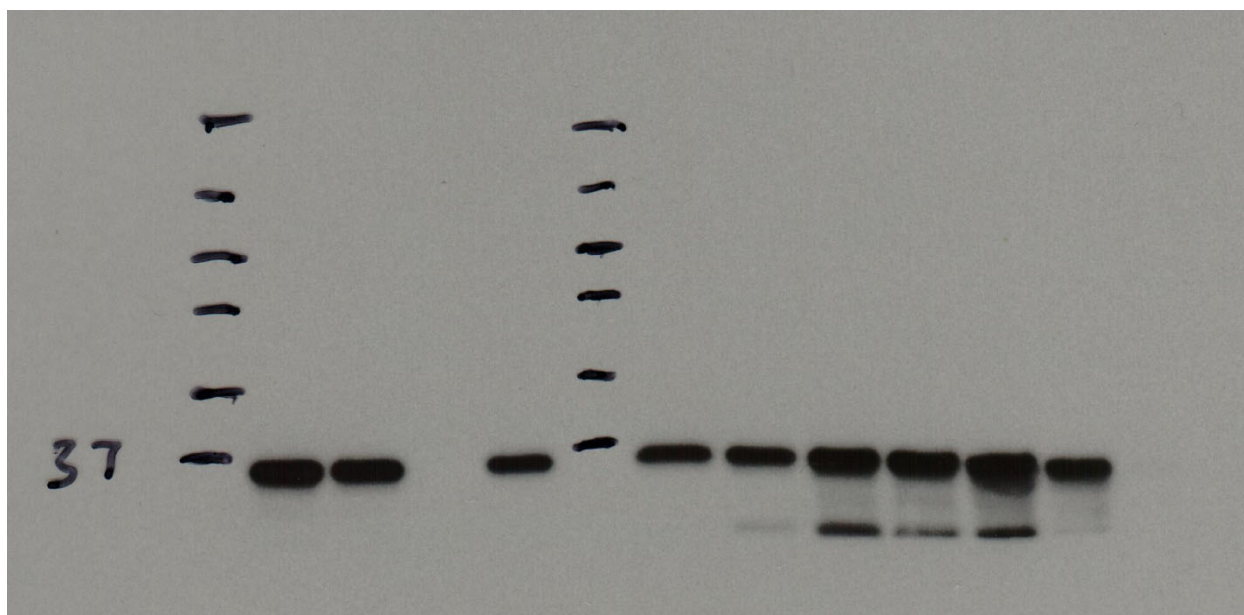

Fig S4g: GAPDH(37kDa) right above  
this box lanes 1-3 -- saline

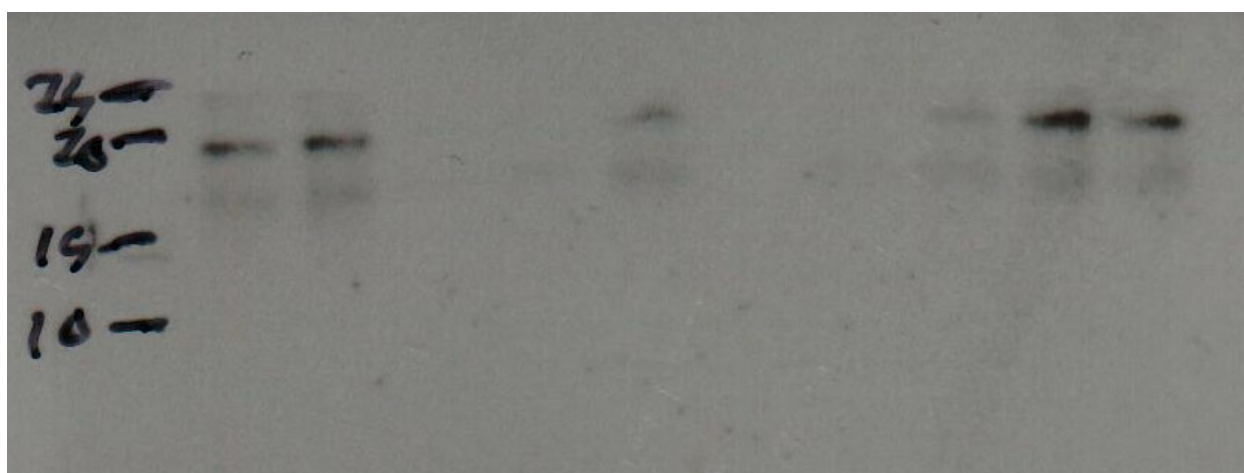

Fig S4g: Cl. Casp 3 (17,19 kDa) right  
above this box lanes 9-11 --OVA



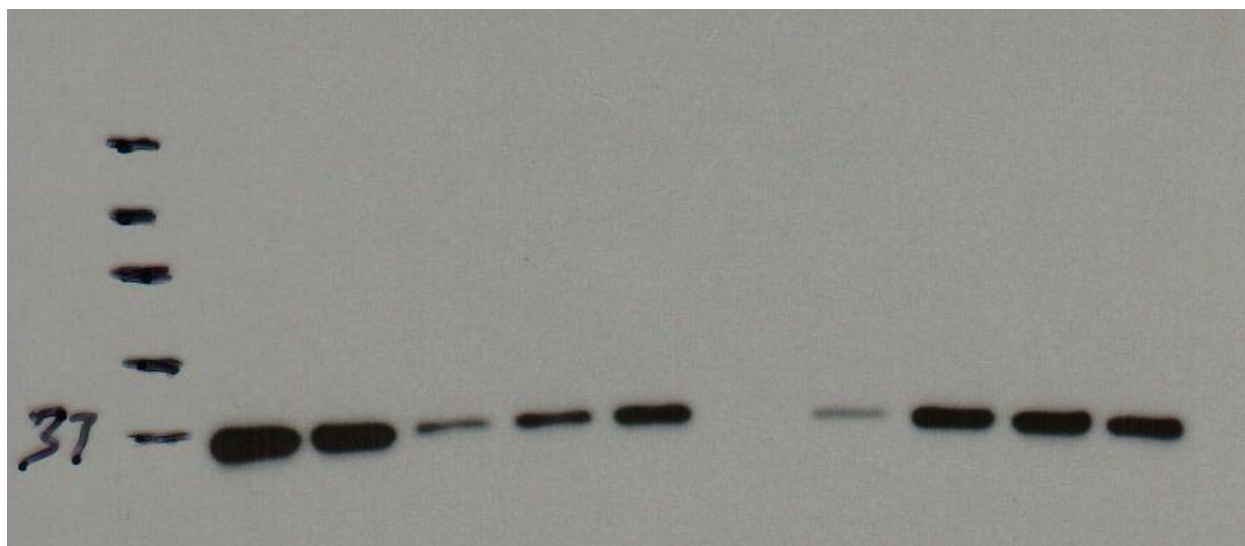

Fig S4g: GAPDH (37kDa) right above  
this box lanes 9-11 --OVA

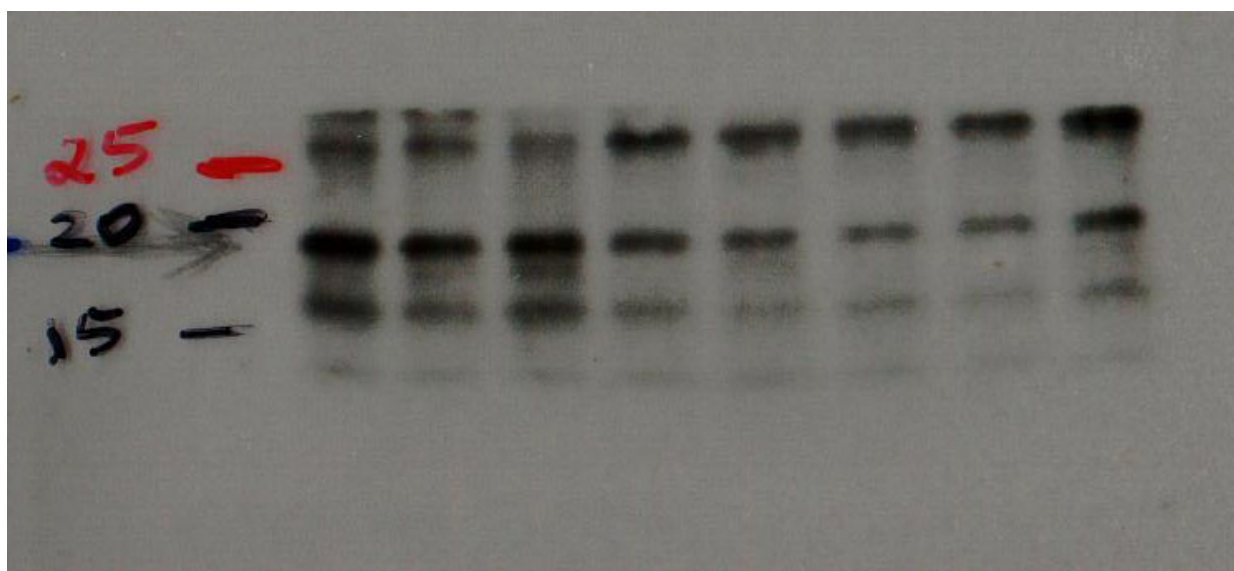

Fig S4g: Cl. Casp 3 (17, 19kDa) right above  
this box lanes 5-7 – reconst OVA



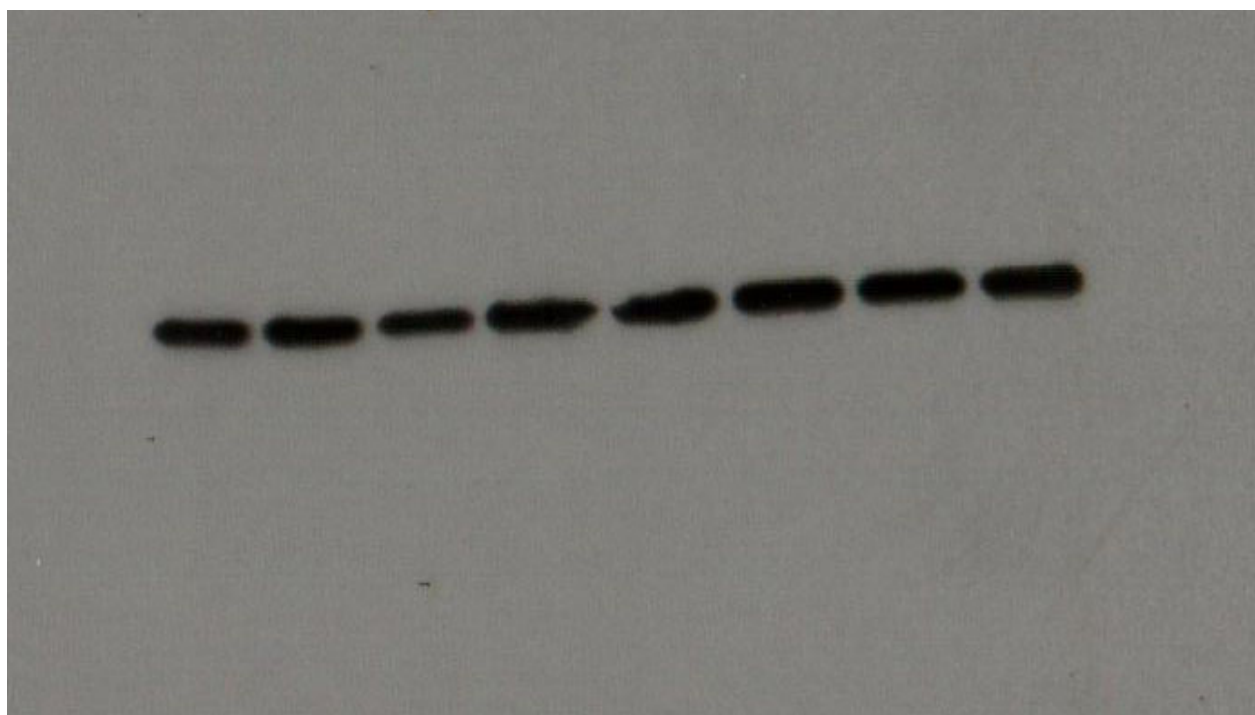

Fig S4g: GAPDH (37kDa) right above this box  
lanes 4-6 – reconst OVA



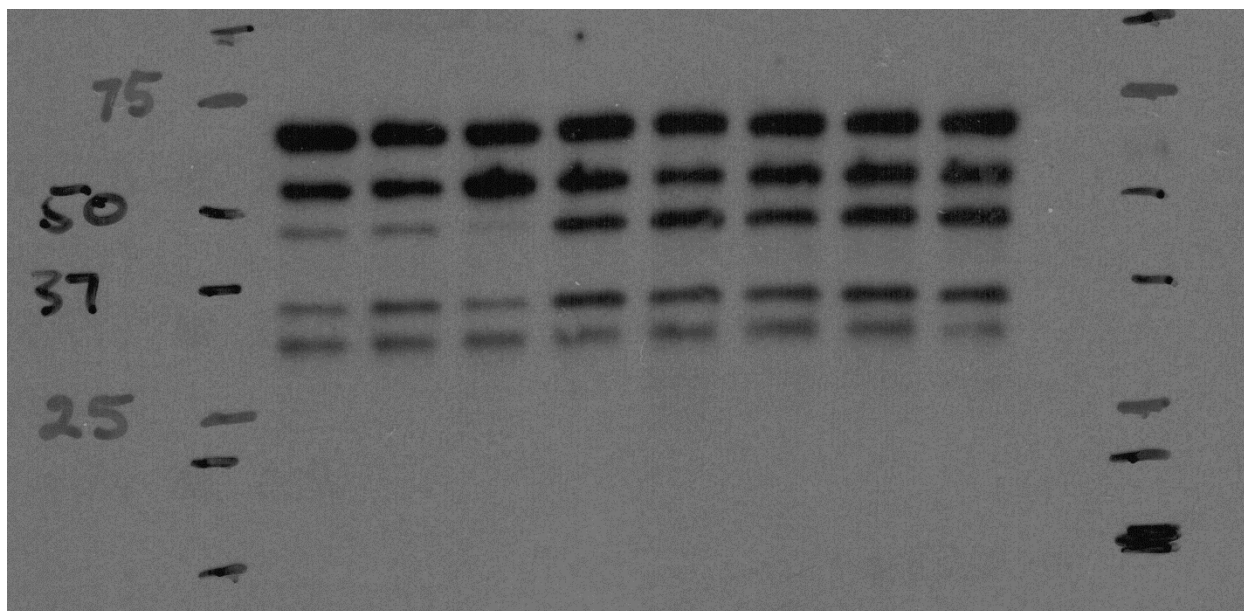

Fig S4i: Chop (27kDa) right above this box: saline (lanes 2-4) and reconst OVA (lanes 5-9)

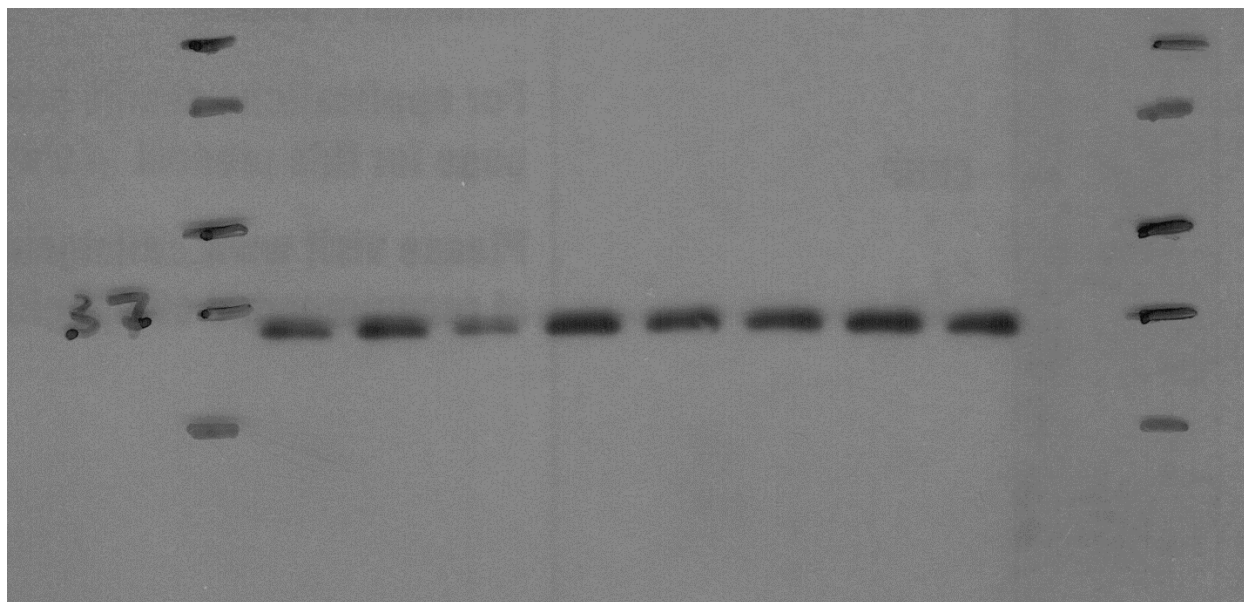

Fig S4i: GAPDH (37kDa) right above this box: saline (lanes 2-4) and reconst OVA (lanes 5-9)
